# Supplementary figures and images for: Green Extracts and UPLC-TQS-MS/MS Profiling of Flavonoids from Mexican Oregano (Lippia graveolens) Using Natural Deep Eutectic Solvents/Ultrasound-Assisted and Supercritical Fluids
Source: MDPI journal article supplement (doi:10.3390/plants12081692), 2023-04-18

**Figure S1. UPLC-MS chromatograms for flavonoid standards.**

**Flavonoids**

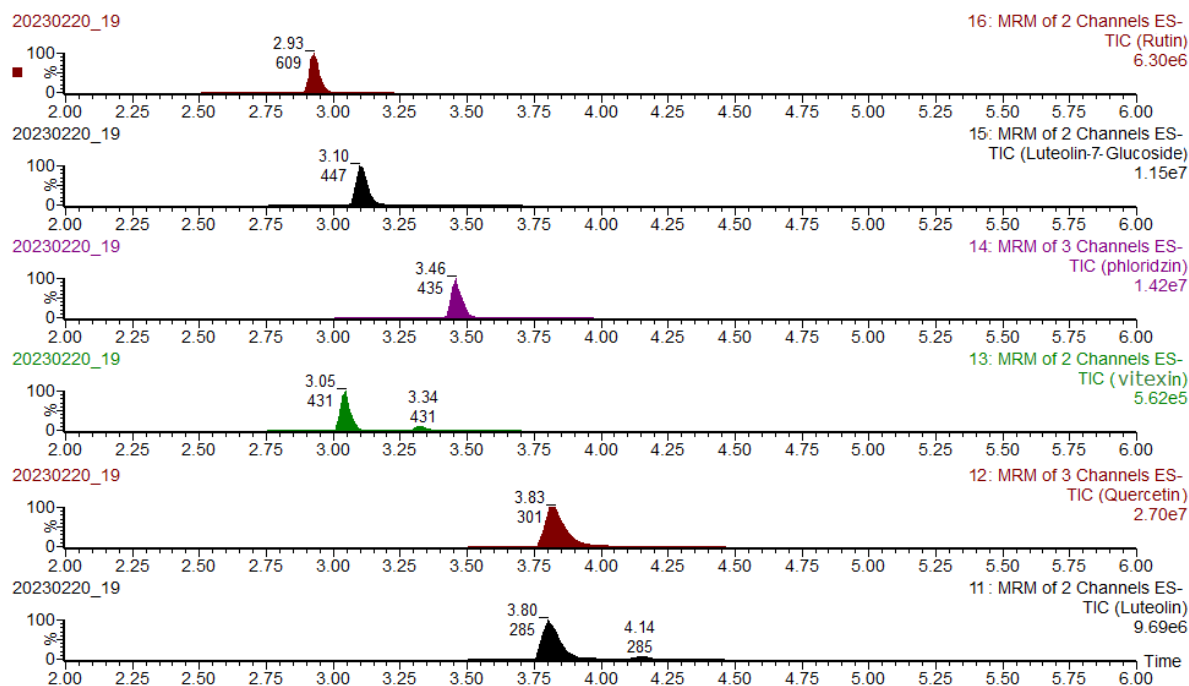

**Flavonoids**

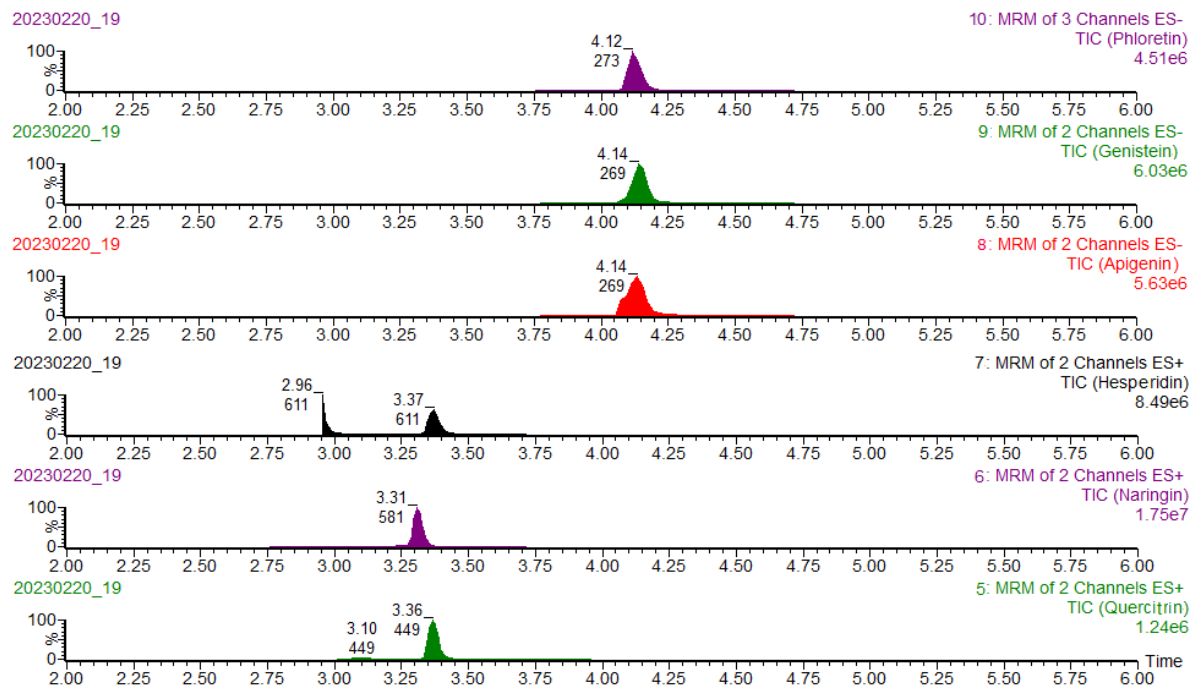

# Flavonoids

20230220\_19

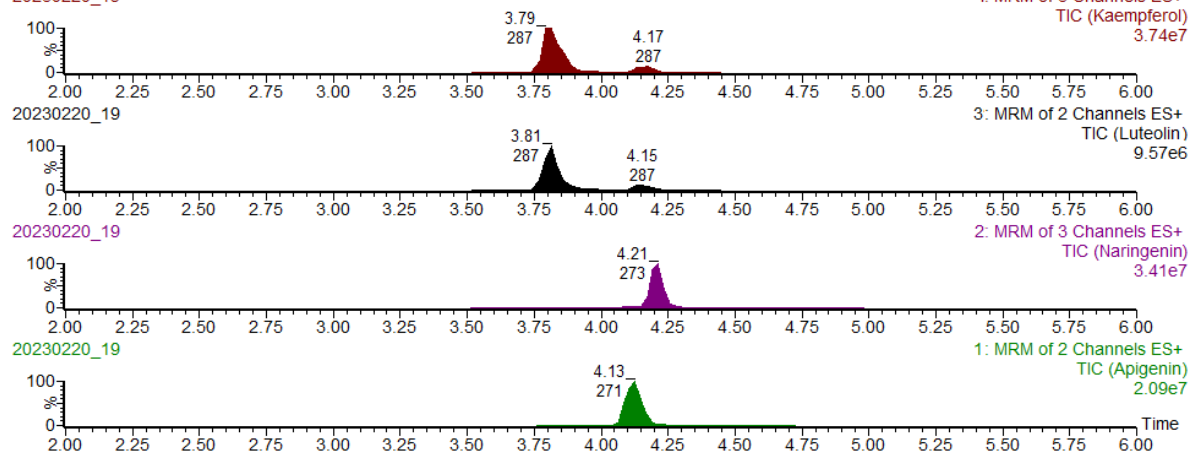

Supplement: s1 [file s1]
